# Supplementary material for: Stabilized homoserine o-succinyltransferases (MetA) or L-methionine partially recovers the growth defect in Escherichia coli lacking ATP-dependent proteases or the DnaK chaperone
Source: PubMed Central journal article supplement (PMC3735405; doi:10.1186/1471-2180-13-179), 2013-07-30
Supplement: 1471-2180-13-179-S1.pdf [file 1471-2180-13-179-S1.pdf]

CLUSTAL W (1.83) multiple sequence alignment

Geobacillus MPINIPKDLPAKEILEQENIFVMDEERAYSQDIRPLNIIILNLMPEK--EKAETQLLRLL 58  
Clostridium MPIKIPDSLPAKEVLTNENIFVMDEHRALHQDVRPLRIAILNLMPTK--ITTETQLLRLLI 58  
Thermotoga MPINVPSGLPAVKVLAKEGIFVMTEKRAIHQDIRPLEILILNLMMPDK--IKTEIQLLRLL 58  
Streptococcus MPIKLDNKLPAALDVLRSSENVFIMDENRASSQDIRPMEVLILNLMPTK--EVTETQLLRLL 58  
Escherichia MPIRVDELPAVNFVLRSENVFVMTTSRASGQEI RPLKVLILNLMPPK--IETENQFLRLL 58  
Methylococcus MPLVAHTDLPTFQRLREEGQDVLSVERAARQDIREMHIGLLNMPDAALEATERQFFRLV 60  
\*\* : \*\* : . \* . \* . : : \*\* \* : : \* : : : \* : : \* : : \* : : \*

Geobacillus G--NSPLQVNVTFRLRPATHEPKTTSKHHLEQFYTIFPHIRHRKFDGMIITGAPVEQMPFE 116  
Clostridium G--NTPIQVEI ELLHPKTHVSKNTP EEHLTKFYKTFDEVKDEKFDGLIITGAPVEQMEFE 116  
Thermotoga G--NTPLQVNVTLTYTETHKPKHTPIEHILKFYTTFSAVKDRKFDGFIITGAPVELLPFE 116  
Streptococcus A--NTPLQINVEFLYMASHKSKNTHAEHMETFYKTFDEIKDKYDGLIVTGAPVEQMPFE 116  
Escherichia S--NSPLQVDIQLLRIDSRESRNTPAEHLN NFYCNFEDIQQDNFDGLIVTGAPLGLVEFN 116  
Methylococcus GGANPIVQFHMHPFTIEGLPRGDQAAEHIARYYESFDRIREEGLDGLIVSGANVTQPHLQ 120  
. \* . : \* . . : : . \* : : \* \* \* : : . \* : : \* : : \* : : \* : : \*

Geobacillus EVNYWGE L TEIM EWTKTNVTSTLHCWGAQAGLYYHYGIPKYELPEKCFGVFNHTVEVKN 176  
Clostridium EVNYWEE L KKIMDWSVHNVYSTFHICWGAQAALYHHYGIKKYELPEKCFGVFNHTVEVKN 176  
Thermotoga EVDYWEE L TEIM EWSRHNVYSTMFICWAAQAGLYYFYGIPKYELPQKLSGVYKHRVAK-D 175  
Streptococcus EVDYWQE L TRVFDWSKKHVYSTLHLCWGAQAGLYYKHGVDKFFLSEKLSGIYKQTVDMPE 176  
Escherichia DVAYWPQ L KQVLEWSKDHTVSTL FVCWAVQAALNILYGI PKQTRTEKLSGVYEHHLHPH 176  
Methylococcus QEAFWQ L TEVFDWARSNVT SILCSCLATHALFQYSYGVERTHLGFKRWGVYSHRVVEPL 180  
: \* : : : \* : : \* \* : \* . . : \* : : \* : : \* : : \*

Geobacillus VKLLRGFD DVFRMPSRHTDVKREDIEKVPDLTILSMSDKAGVCLVASNDG-RRIFLTGH 235  
Clostridium TMLLRGFDDCFYAPHSRHT EVRREDIEKVG EIDILSDSEEAGVYIMKTRGG-RQVFVTGH 235  
Thermotoga SVLFRGHDDFFWAPHSRYTEVKKEIDDKVPELEILAESDEAGVYVANKSE-RQIFVTGH 234  
Streptococcus NFLMNGFDDSFVSPHSRYTEVTLEDIKNKTDLDVVASGQEVGLSILASKDL-REVYSFGH 235  
Escherichia ALLTRGFDDSF LAPHSRYADFPALIRDYTDLEILAETEEDAYLFASKDK-RIAFVTGH 235  
Methylococcus HPLVADINTRFDVPHSRYNEIFREDME AAG-LRVLVESEEAGVHLAVSPDLFRVIYFQAH 239  
\* . : \* \* \* \* : : . : : : : . . \* : . \*

Geobacillus PEYDATT LKEEYERDLAKGLP-----IHIPESYF----- 264  
Clostridium SEYDQFT LKEEYERDLAKGLK-----IKMPKNYF----- 264  
Thermotoga PEYDRYTLRDEYRDIGRNLK-----VPI PANYF----- 263  
Streptococcus FEYDRDTLAREYRRDLEVGIN-----PDVPANYF----- 264  
Escherichia PEYDAQTLAQEFFRDVEAGLD-----PDVPYNYF----- 264  
Methylococcus PEYDTVSL LKEYKREILRYFSGEREDYPPFPEHYFSLEVGAA LNDYGQALRSARRAGRAP 299  
\*\*\* : \* \* . \* : : : . \* \*\*

Geobacillus ---PNDDPSQPPLNTWRSHANLLFVNWLNYYVYQETPYEWE----- 302  
Clostridium ---PDDDPTKPPVNWNRGHANLLFSNWLNYVYQETPFDLNELK----- 305  
Thermotoga ---PNDDPTKTPILTWSHAHLFFSNWLN YCIYQKTPYRLEDIH----- 304  
Streptococcus ---PGDDPSQEPKLRWNLAASTFFSNW INYAVYQETPYRLEELEDDFSFYGYL--- 314  
Escherichia ---PHNDPQNTPRASWRSHGNLLFTNWLNYVYQITPYDLRHMNPTLD----- 309  
Methylococcus PPFPEEFVLRHLDNTWRDTAKAVFNWNLGKIYQITDQDRRKPFMAHIDPDNPLGLA 355  
\* : . \* . \* \* : .

Figure S1.
